# Supplementary material for: Electrochemical detection of diclofenac and clindamycin using ZnO nanorods/RGO nanocomposite modified electrode
Source: Royal Society of Chemistry journal article supplement (doi:10.1039/d5ra07011b), 2025-01-01
Supplement: d5ra07011b1.pdf [file d5ra07011b1.pdf]

## **SUPPLEMENTARY INFORMATION**

# **Electrochemical Detection of Clindamycin and Diclofenac Using ZnO Nanorods/RGO Nanocomposite Modified Electrode**

**Gokul Sridharan<sup>1,#</sup>, Surendar Balu<sup>1#</sup>, Raji Atchudan<sup>2#</sup>, Chandramohan Govindasamy<sup>3</sup>,  
Dhanraj Ganapathy<sup>1</sup>, Sandeep Arya<sup>4</sup>, and Ashok K. Sundramoorthy<sup>1,\*</sup>**

*<sup>1</sup>Centre for Nano-Biosensors, Department of Prosthodontics, Saveetha Dental College and  
Hospitals, Saveetha Institute of Medical and Technical Sciences, Poonamallee High Road,  
Velappanchavadi, Chennai, 600077, Tamil Nadu, India*

*<sup>2</sup>School of Chemical Engineering, Yeungnam University, Gyeongsan 38541, Republic of  
Korea*

*<sup>3</sup>Department of Community Health Sciences, College of Applied Medical Sciences, King Saud  
University, P.O. Box 10219, Riyadh 11433, Saudi Arabia.*

*<sup>4</sup>Department of Physics, University of Jammu, Jammu, Jammu and Kashmir 180006, India*

\*Corresponding author:

Email: [ashok.sundramoorthy@gmail.com](mailto:ashok.sundramoorthy@gmail.com)

#These authors contributed equally.

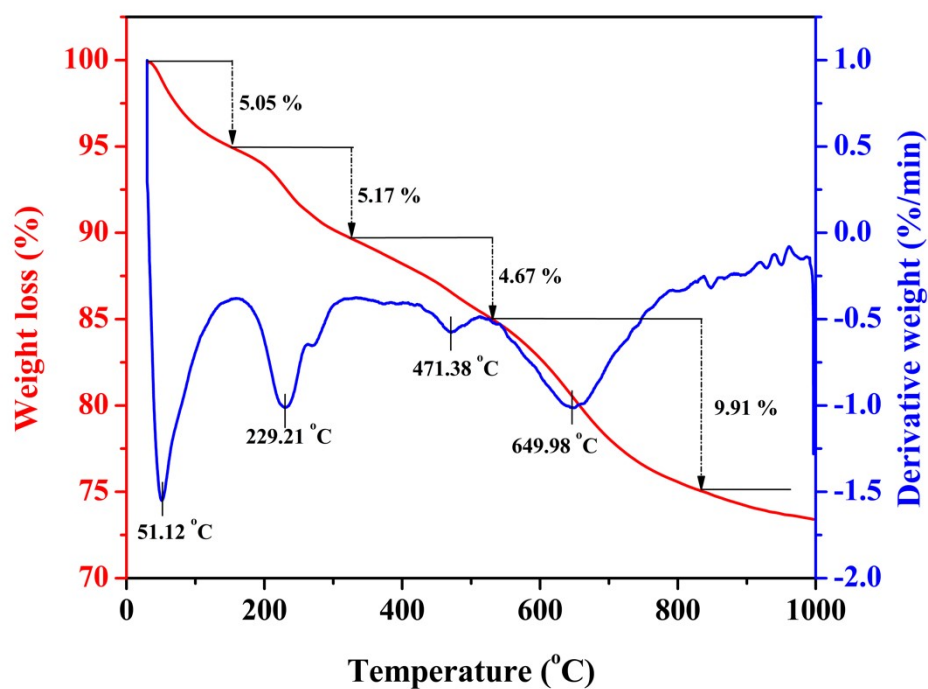

**Figure S1:** TGA curve of ZnO/GO nanocomposite.

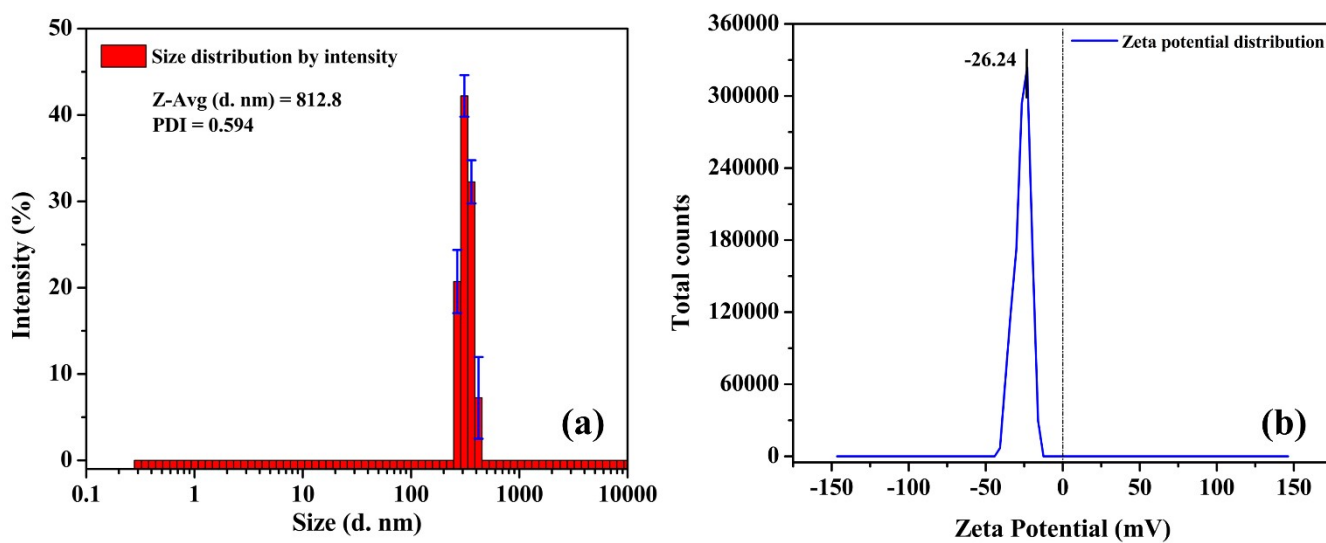

**Figure S2:** DLS (a) and Zeta potential (b) of ZnO/GO nanocomposite dispersion.

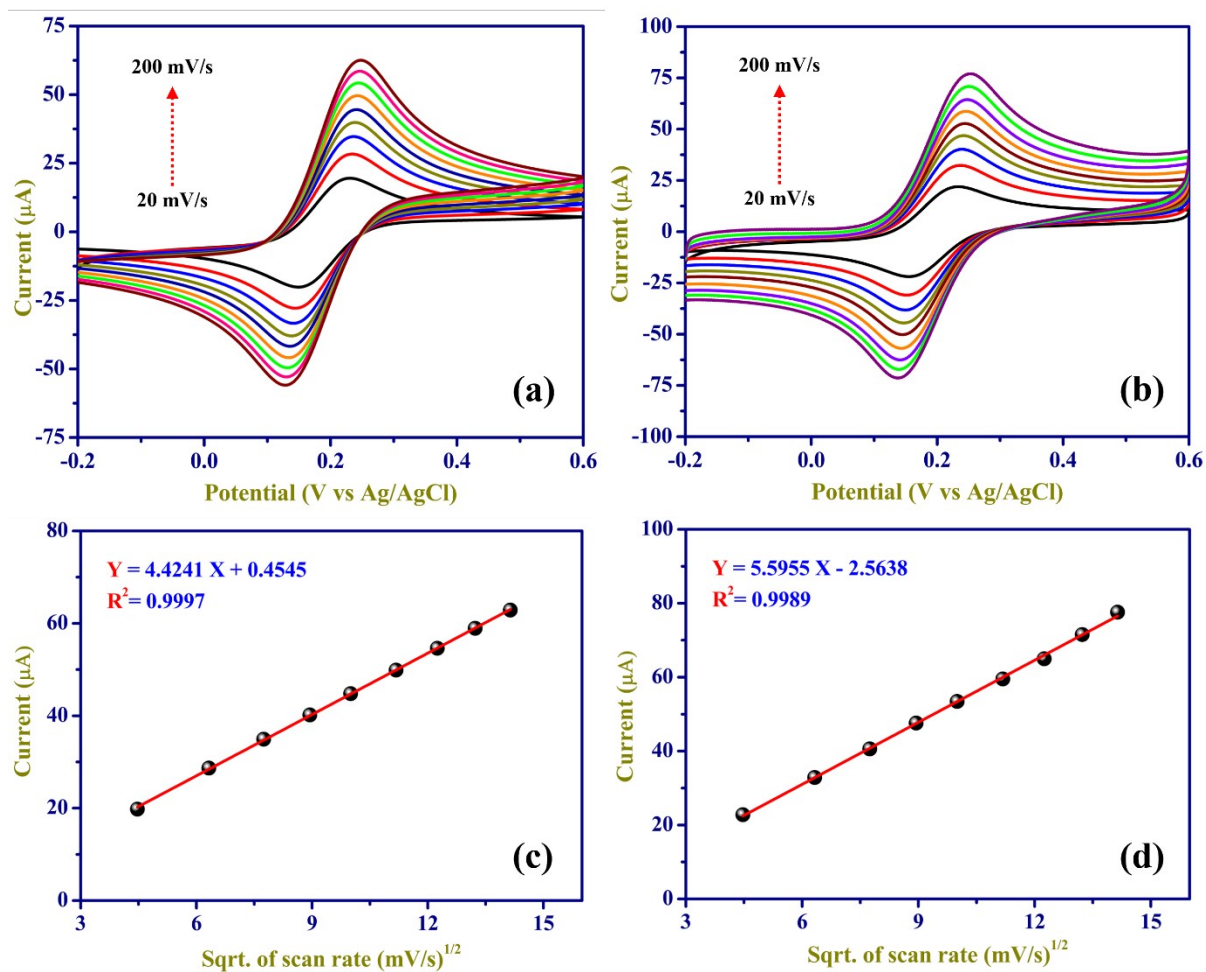

**Figure S3:** Cyclic voltammograms of bare GCE (a) and ZnO/RGO/GCE (b) in 0.1 M KCl containing 2 mM  $[\text{Fe}(\text{CN})_6]^{3-/4-}$  at a different scan rate (20, 40, 60, 80, 100, 125, 150, 175, 200 mV/s). Linear plots were drawn between the anodic peak current of  $[\text{Fe}(\text{CN})_6]^{3-/4-}$  and the square root of the scan rate ( $\text{mV/s})^{1/2}$  on bare GCE (c) and ZnO/RGO/GCE (d).

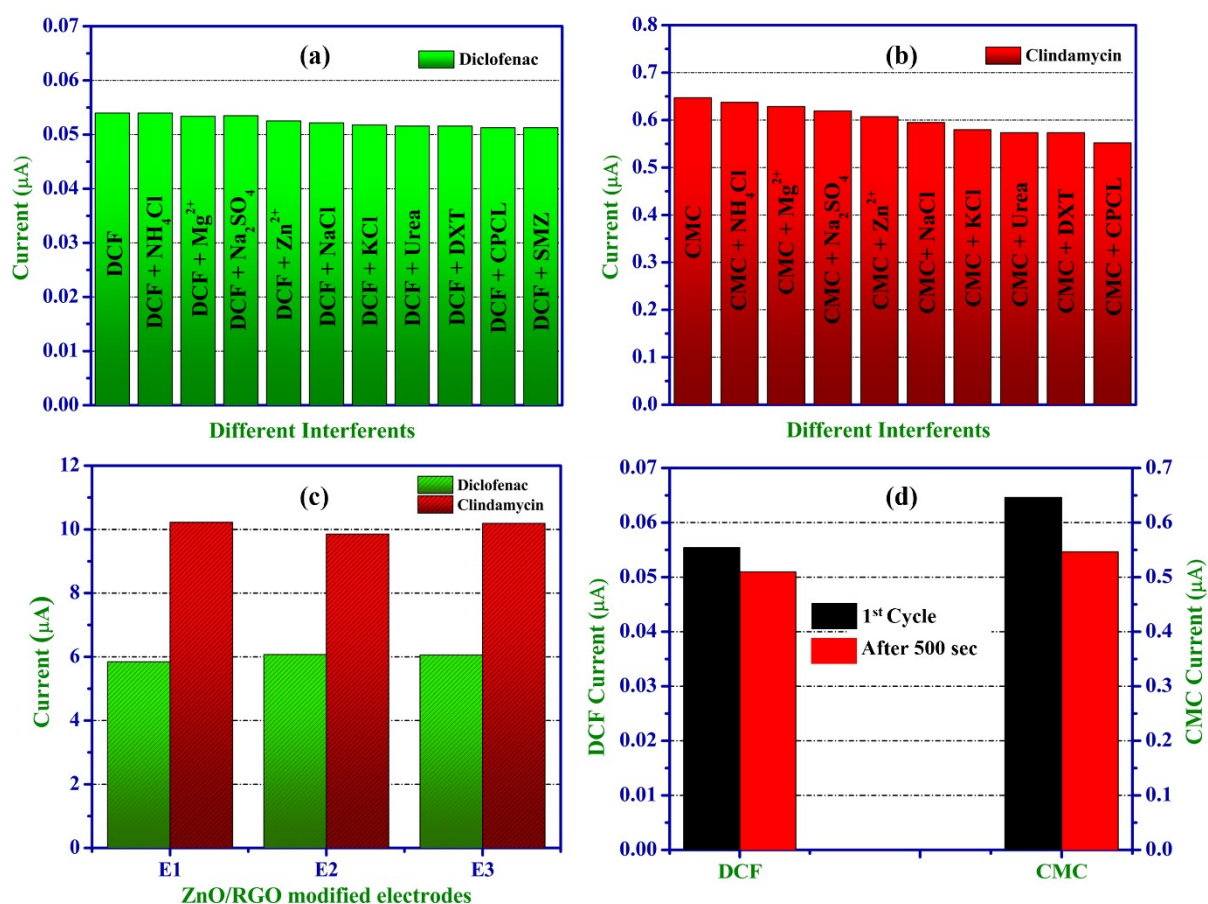

**Figure S4:** Interference studies were carried out. The bar graphs depict the effect of interference with (a) 5  $\mu$ M DCF and (b) 20  $\mu$ M CMC. (c) The bar graph illustrates the reproducibility of the ZnO/RGO-modified sensor for detecting 100  $\mu$ M DCF and 200  $\mu$ M CMC. (d) The bar graph illustrates the stable response data of the ZnO/RGO/GCE for the detection of 5  $\mu$ M DCF and 20  $\mu$ M CMC. We have compared the oxidation peak currents ( $\mu$ A) of the 1<sup>st</sup> cycle (black) and after 500 sec (red).
